# Supplementary material
Source: MDPI journal article supplement (https://www.mdpi.com/2073-4352/13/7/1050)
Supplement: s1 [file s1]

## ***Supplementary Material***

### **The Structure and Microwave Dielectric Properties of $\text{MgTi}_{1-x}(\text{Mn}_{1/3}\text{Nb}_{2/3})_x\text{O}_3$ Ceramics**

Huan Huang, Baoyang Li, Fanshuo Wang, Yuanming Lai<sup>1</sup> and Gang Jiang\*

*School of Mechanical and Electrical Engineering, Chengdu University of Technology, Chengdu 610059, China*

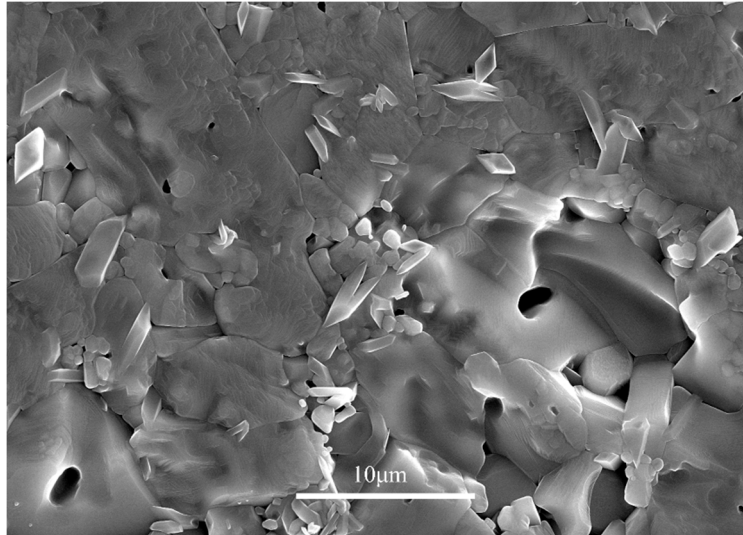

**Figure S1.** The SEM images of  $\text{MgTi}_{1-x}(\text{Mn}_{1/3}\text{Nb}_{2/3})_x\text{O}_3$  ceramics:  $x = 0$ , 1250 °C.

---

\* Corresponding Authors: laiyanming19@cdut.edu.cn (Y. Lai), jianggang@cdut.edu.cn (G. Jiang)
